# Supplementary material for: Metal–organic frameworks@graphene hybrid aerogels for solid-phase extraction of non-steroidal anti-inflammatory drugs and selective enrichment of proteins
Source: Royal Society of Chemistry journal article supplement (doi:10.1039/c6an00353b), 2016-01-01
Supplement: c6an00353b1.pdf [file c6an00353b1.pdf]

## Supporting Information

### **Metal-organic frameworks@graphene hybrid aerogel for solid-phase extraction of non-steroidal anti-inflammatory drugs and selective enrichment of proteins**

Xiaoqiong Zhang, Qionglin Liang,\* Qiang Han, Wei Wan, Mingyu Ding\*

Key Laboratory of Bioorganic Phosphorus Chemistry and Chemical Biology, Ministry of Education, Department of Chemistry, Tsinghua University, Beijing 100084, China

Correspondence:

Prof. Mingyu Ding, Department of Chemistry, Tsinghua University, Beijing 100084, P. R. China

Email: dingmy@mail.tsinghua.edu.cn

Tel: +86-10-62797087

Prof. Qionglin Liang, Department of Chemistry, Tsinghua University, Beijing 100084, P. R. China

Email: liangql@mail.tsinghua.edu.cn

Tel: +86-10-62772263

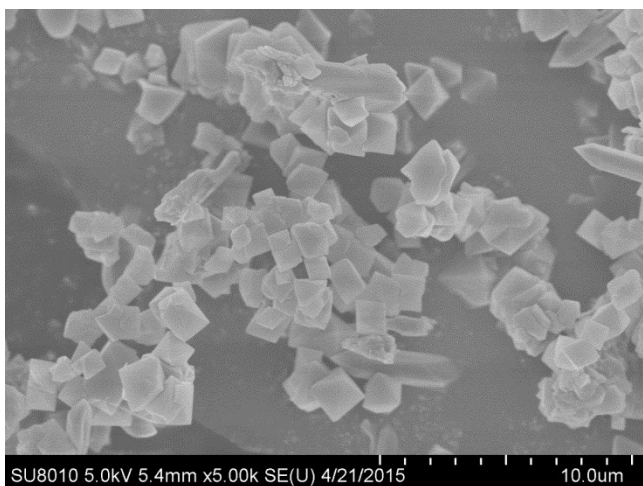

**Fig. S1.** SEM image of MIL-101.

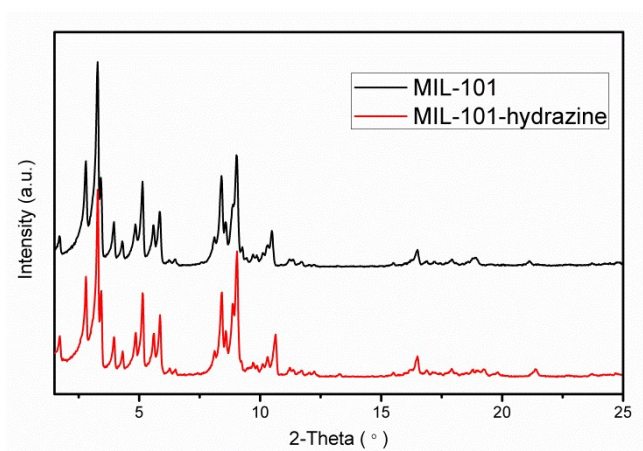

**Fig. S2.** XRD patterns of MIL-101 and MIL-101 treated by hydrazine vapor at 95 °C for 24 h.

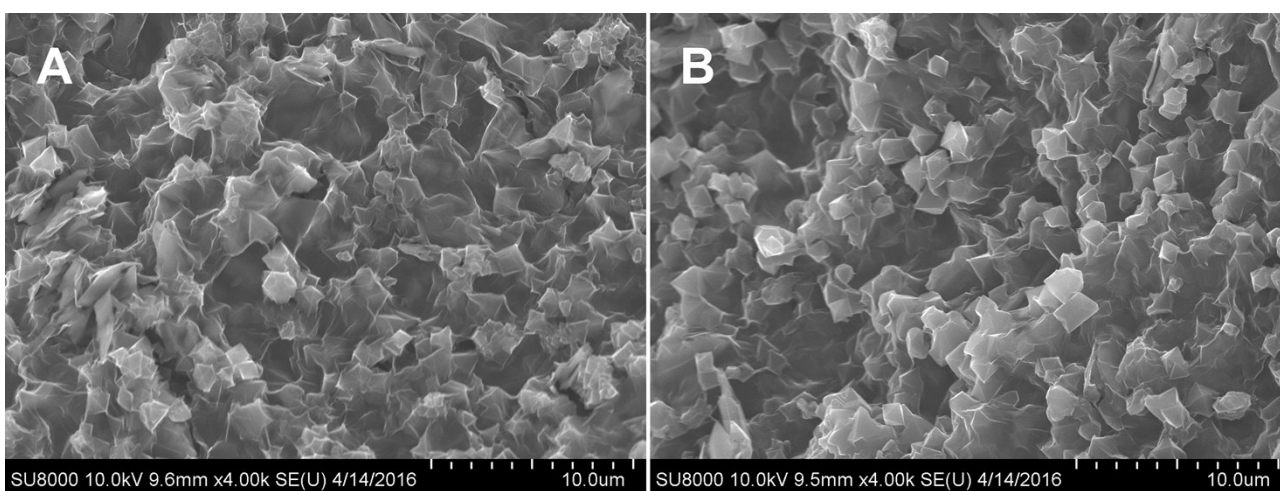

**Fig. S3.** SEM images of hybrid aerogels after (A) replicate extractions and (B) dramatic ultrasonic for 10 min in a mixture solution of EtOH and water.

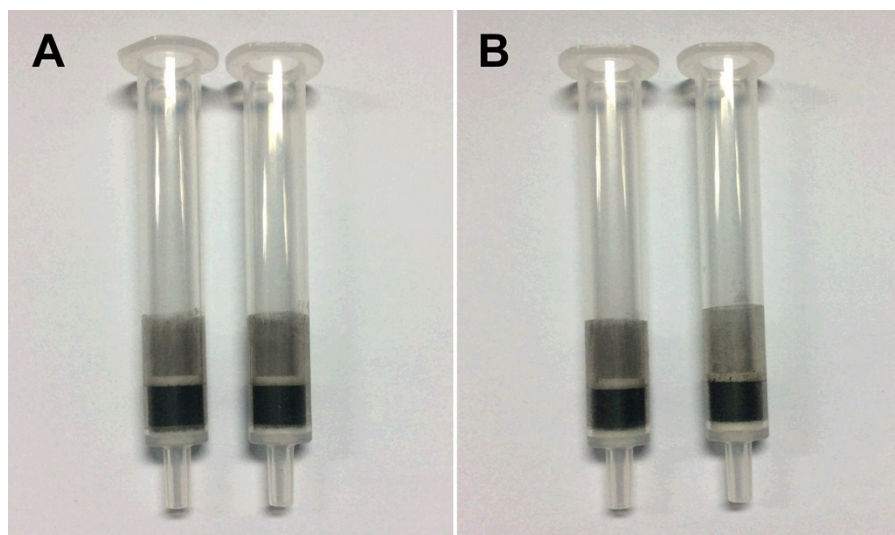

**Fig. S4.** Photographs of (A) newly prepared hybrid aerogel packed SPE cartridges and (B) SPE cartridges after 20 replicate extractions.

**Table S1**

Analytical figures of merit through MIL-101@graphene hybrid aerogel based SPE-HPLC-UV method.

| Analyte      | pKa  | Regression equation <sup>a</sup> | R <sup>2</sup> | Linear range<br>(ng mL <sup>-1</sup> ) | LOD<br>(ng mL <sup>-1</sup> ) | RSD (%)              |                      |                                  |
|--------------|------|----------------------------------|----------------|----------------------------------------|-------------------------------|----------------------|----------------------|----------------------------------|
|              |      |                                  |                |                                        |                               | Run-to-<br>run (n=6) | Day-to-<br>day (n=3) | Cartridge-to-<br>cartridge (n=4) |
| Naproxen     | 4.39 | $y = 0.21478x + 0.05264$         | 0.9996         | 0.2 – 50                               | 0.01                          | 6.1                  | 4.3                  | 5.5                              |
| Felbinac     | 4.30 | $y = 0.03735x + 0.00176$         | 1.0000         | 0.2 – 50                               | 0.08                          | 4.4                  | 4.6                  | 4.8                              |
| Carprofen    | 4.42 | $y = 0.08628x - 0.00782$         | 0.9997         | 0.2 – 50                               | 0.03                          | 5.6                  | 5.3                  | 9.1                              |
| Flurbiprofen | 4.42 | $y = 0.03066x + 0.02130$         | 0.9984         | 0.2 – 50                               | 0.04                          | 8.5                  | 9.0                  | 6.0                              |
| Ibuprofen    | 4.38 | $y = 0.03806x + 0.02115$         | 0.9973         | 0.2 – 50                               | 0.10                          | 3.7                  | 3.4                  | 5.0                              |

<sup>a</sup>y=peak area in mAU min and x= concentration in ng mL<sup>-1</sup>.

**Table S2**

Comparison of different methods for the determination of non-steroidal anti-inflammatory drugs.

| Method                                              | Detection  | Sample volume | LOD                    | Refs.     |
|-----------------------------------------------------|------------|---------------|------------------------|-----------|
|                                                     |            | (mL)          | (ng mL <sup>-1</sup> ) |           |
| Hollow fiber liquid-phase microextraction           | UPLC-MS/MS | 5             | 0.5-1.25               | [38]      |
| C18 sorbent based microextraction                   | HPLC-PDA   | 0.1           | 0.03                   | [39]      |
| Electromembrane extraction                          | HPLC-DAD   | 10            | 0.08-3.36              | [40]      |
| Magnetic matrix solid phase dispersion              | HPLC-UV    | 1000          | 1-2                    | [41]      |
| Immobilized carboxylated carbon nanotubes based SPE | CE-MS      | 5             | 1.6-2.6                | [42]      |
| MIL-101@graphene hybrid aerogel based SPE           | HPLC-UV    | 100           | 0.01-0.10              | This work |

**Table S3**

Recoveries of environmental water samples spiked with five NSAIDs (n=3).

| Analyte      | Concentration added (ng mL <sup>-1</sup> ) | Tap water samples |         | River water samples |         |
|--------------|--------------------------------------------|-------------------|---------|---------------------|---------|
|              |                                            | Recovery (%)      | RSD (%) | Recovery (%)        | RSD (%) |
| Naproxen     | 0.5                                        | 97.6              | 3.8     | 92.6                | 3.6     |
|              | 2.0                                        | 105.0             | 5.7     | 80.8                | 3.4     |
| Felbinac     | 0.5                                        | 105.5             | 3.3     | 99.4                | 8.7     |
|              | 2.0                                        | 106.9             | 3.6     | 89.7                | 2.3     |
| Carprofen    | 0.5                                        | 106.5             | 2.5     | 87.7                | 7.3     |
|              | 2.0                                        | 99.1              | 3.7     | 83.2                | 4.1     |
| Flurbiprofen | 0.5                                        | 82.6              | 2.6     | 96.2                | 5.3     |
|              | 2.0                                        | 93.8              | 5.5     | 96.3                | 6.0     |
| Ibuprofen    | 0.5                                        | 96.2              | 4.2     | 102.6               | 4.6     |
|              | 2.0                                        | 92.0              | 3.4     | 105.8               | 4.0     |
